# Supplementary material
Source: publisher site journal article supplement (http://kjim.org/upload/media/kjim-2021-539-suppl4.pdf)
Supplement: Supplementary file 1 [file kjim-2021-539-suppl4.pdf]

**Supplementary Table 4. Baseline characteristics of the patients who did not receive PCI or coronary artery bypass graft, or received failed PCI**

| Characteristic                   | Overall<br>(n = 253) | On-hours group<br>(n = 98) | Off-hours group<br>(n = 155) | p value |
|----------------------------------|----------------------|----------------------------|------------------------------|---------|
| In-hospital death                | 81 (32.0)            | 29 (29.6)                  | 52 (33.5)                    | 0.511   |
| Clinical outcomes up to 6 months | 172                  | 69                         | 103                          |         |
| MACCE                            | 46 (26.7)            | 16 (23.2)                  | 30 (29.1)                    | 0.389   |
| NACE                             | 37 (21.5)            | 14 (20.3)                  | 23 (22.3)                    | 0.750   |
| All-cause mortality              | 39 (22.7)            | 15 (21.7)                  | 24 (23.3)                    | 0.811   |
| Cardiac death                    | 31 (18.0)            | 12 (17.4)                  | 19 (18.4)                    | 0.860   |
| Non-cardiac death                | 8 (4.7)              | 3 (4.3)                    | 5 (4.9)                      | 1.000   |
| NFMI                             | 8 (4.7)              | 2 (2.9)                    | 6 (5.8)                      | 0.478   |
| Any revascularization            | 4 (2.3)              | 1 (1.4)                    | 3 (2.9)                      | 0.650   |
| CVA                              | 3 (1.7)              | 0                          | 3 (2.9)                      | 0.275   |
| ST                               | 0                    | 0                          | 0                            | -       |
| Clinical outcomes up to 3 years  | 172                  | 69                         | 103                          | 0.317   |
| MACCE                            | 89 (51.7)            | 34 (49.3)                  | 55 (53.4)                    | 0.596   |
| NACE                             | 66 (38.4)            | 26 (37.7)                  | 40 (38.8)                    | 0.879   |
| All-cause mortality              | 82 (47.7)            | 32 (46.4)                  | 50 (48.5)                    | 0.780   |
| Cardiac death                    | 60 (34.9)            | 23 (33.3)                  | 37 (35.9)                    | 0.727   |
| Non-cardiac death                | 22 (12.8)            | 9 (13.0)                   | 13 (12.6)                    | 0.935   |
| NFMI                             | 12 (7.0)             | 3 (4.3)                    | 9 (8.7)                      | 0.366   |
| Any revascularization            | 6 (3.5)              | 2 (2.9)                    | 4 (3.9)                      | 1.000   |
| CVA                              | 6 (3.5)              | 1 (1.4)                    | 5 (4.9)                      | 0.404   |
| ST                               | 1 (0.6)              | 1 (1.4)                    | 0                            | 0.401   |

Values are presented as number (%).

PCI, percutaneous coronary intervention; MACCE, major adverse cardiac and cerebrovascular event; NACE, net adverse clinical event; NFMI, non-fatal myocardial infarction; CVA, cerebrovascular accident; ST, stent thrombosis.
